# Supplementary material for: Evidence for host–microbiome co‐evolution in apple
Source: PubMed Central journal article supplement (PMC9299473; doi:10.1111/nph.17820), 2021-11-25
Supplement: NPH-234-2088-s002.pdf [file NPH-234-2088-s002.pdf]

**New Phytologist Supporting Information, Evidence for host-microbiome co-evolution in apple. Ahmed Abdelfattah, Ayco J.M. Tack, Birgit Wasserman, Jia Liu, Gabriele Berg, John Norelli, Samir Droby, Michael Wisniewski. 18 October 2021.**

**Table S2.** The supplementary document includes the accession and sequences of *Malus* species, the calculated distances, and the phylogenetic trees.

>EF113171.1 *Malus kansuensis*

```
TCGAACCTGCACAGCAGAACGACCCGAGAACCCGTTTCAACGTCGGGGGTCGGCGGGCCTCCGGGCCCGG
CGTCCCCTTTGTCCCGGGAGCTCGCTCCCGGGCGTACAAACGAACACCGGCGCGTATTGCGCCAAGGAAC
CTGAACGAAAGAGAGCGCTCCCGCCGCCCGAAACGGTGTGCGAGCGGGTGCCTGCTTCTTCGATATG
TCAAACGACTCTCGGCAACGGATATCTCGGCTCTCGCATCGATGAAGAACGTAGCGAAATGCGATACTT
GGTGTGAATTGCAGAATCCCGTGAACCATCGAGTCTTTGAACGCAAGTTGCGCCGAAGCCATCAGGCCG
AGGGCACGCCTGCCTGGGCGTCACACGCCGTTGCCCGCCCGCACCTCCTTAGGGAGCGTCGGAGGGGGCG
GAAGATGGCCTCCCGTGCCTCACCCCGCGCGTTGGCACAAAAGCCGGTCTCGGCGACGAACGCCACG
ACAATCGGTGGTTGTGAACCTCGGTTGCCCGTTGTGCGCTTTCGTCGCGGTCCGAGCGGCTCGCGACGC
TCACTGCTCCGCTTCGACGGAGCTTTCAACG
```

>JQ392466.1 *Pyrus communis*

```
TTGTGCAACCTGCACAGCAGAATGACTCGAGAACCTATTCCAATGTCGAGGGCCGGCGGGCCTTCAAGCT
TGCGCTCCCCTTATCCCGGAAGCCCGCTCCTGGGCGTACAAACGAACACCGGTGCGTCTTACGCCAAGGA
ACCTAAACGAAAGAGCGCGCTCCAGCCACCTCGGAAACAGTGCACGCGCGAGTGCCTAGTCTTCTAT
AAGTCAAATGACTCTCAGTAACGGATATCTCGGCTCTCGTATCGATCAAGAACGTAGCGAAATGCAATA
CTTGGTGTGAATTGCAGAATCCCGTGAACCATCGAGTCTTTGAACACAAGTTGCGAGGTCATGCTTGCTT
AGGAGTCACACGTCGTTGCCCGCTGACACCTCCTCGGGAGCGTCGGGGTGCAGACGATATCCTCCTGT
GCATCGACCTGCGCGATTGGCATAAATGTCGAGTCTCGACGACGAATGCCAAGACAATCGATGGTTACC
AAACCTCGGTTGCTGTTGTGCGCTTTCGTCGCGCTCCGAGTGGCTCGCGACGCTCCCGCTTACTTCG
GCCAAGCTTTCAACA
```

>MH270485.1 *Malus yunnanensis*

```
TCGAACCTGCACAGCAGAACGACCCGAGAACCCGTTTCAACGTCGGGGGAACGGCGGGCCTCCGGGCCCGG
GCGTCCCCTTTGTCCCGGGACCCCGCTCCCGGGCGTACAAACGAACACCGGCGCGTGTTCGCGCAAGGAA
CCTGAACGAAAGAGAGCGCTCCCGCCGCCCGTAAACGGTGCAGCGAGCGGGTGCCTGCTTCTTCGATA
TGTCAAAACGACTCTCGGCAACGGATATCTCGGCTCTCGCATCGATGAAGAACGTAGCGAAATGCGATAC
TTGGTGTGAATTGCAGAATCCCGTGAACCATCGAGTCTTTGAACGCAAGTTGCGCCGAAGCCATCAGGC
CGAGGGCACGCCTGCCTGGGCGTCACACGCCGTTGCCCGCCCGCACCTCCCTCGGGAGCGTCGGAGGGG
CAGAAGATGGCCTCCCGTGCCTCACCCCGCGCGTTGGCACAAAAGTCCGGTCTCGGCGACGAACGCCA
CGACAATCGGTGGTTGTCAAACCTCGGTTGCCCGTTGTGCGCTTTCGTCGCGCTTCGAGCGGCTCGCGAT
GCTCACTGCTCCGCTTCGGCGGAGCTTTCAACGCGA
```

>JQ392445.1 *Malus prattii*

```
TTGTGCAACCTGCACAGCAGAACGACCCGAGAACCCGTTTCAACGTCGGGGGAACGGCGGGCCTCCGGGC
CCGGCGTCCCCTTTGTCCCGGGAGCCCGCTCCCGGGCGTACAAACGAACACCGGCGCGTGTTCGCGCAAG
GAACCTGAACGAAAGAGAGCGCTCCCGCCGCCCGTAAACGGTGCAGCGGGCGGGTGCCTGCTTCTTCG
```

ATATGTCAAACGACTCTCGGCAACGGATATCTCGGCTCTCGCATCGATGAAGAACGTAGCGAAATGCGA  
TACTTGGTGTGAATTGCAGAATCCCGTGAACCATCGAGTCTTTGAACGCAAGTTGCGCCCGAAGCCATCA  
GGCCGAGGGCACGCCTGCCTGGGCGTCACACGCCGTTGCCCCCCCCGACCTCCCTCGGGAGCGTCGGAG  
GGGCRGAAGATGGCCTCCCGTGCCTACCCCGCGCGGTTGGCACAAAAGTCGGGTCTCGGCGACGAACG  
CCACGACAATCGGTGGTGTCAAACCTCGGTTGCCGTTGTGCGCTTTCGTGCGGCTTCGAGCGGCTCGC  
GATGCTCCCTGCTCCGCTTCGGCGGAGCTTTCAACG

>JQ392448.1 *Malus ioensis*

TTGTGCAACCTGCGCAGCAGAACGACCCGAGAACCAGTTTCAAAGTCGGGGGTTCGGCGGGCCTCCGGGCT  
CGGCGTCCCCTTCGTCCCGGGAGCCCGCTCCCGGGCGTACAAACGAACACCGGCGCGAACTGCGCCAAGG  
AACCTGAACGAAAGAGCGCGCTCCCGCCGCCCGGAAACGGTGCAGCGCGGGTGCCTCGTCTTCCA  
TACAAGTCAAACGACTCTCGGCAACGGATATCTCGGCTCTCGCATCGATGAAGAACGTAGCGAAATGCG  
ATACTTGGTGTGAATTGCAGAATCCCGTGAACCATCGAGTCTTTGAACGCAAGTTGCGCCCGAAGCCATC  
AGGCCGAGGGCACGCCTGCCTGGGCGTACACGCCGTTGCACCCCGCACCTCCCTCGGGAGCGTCGGGG  
GGCGGACGATGGCCTCCCGCGCGTACCCCGCGCGGTTGGCACAAATGCCGGTCTCGGCGACGGACGC  
CACGACAATCGGTGGTGCCTGAACCTCGGTTGCCGTTGTGCGCTTTCGTGCGCCCCGAGCGGCCCGCG  
ACCTCGCTGCTCCCGCTTCGGCGGAGCTTTGACG

>AF186525.1 *Malus coronaria*

TCGAACCTGCGCAGCAGAACGACCCGAGAACCAGTTTCAAAGTCGGGGGTTCGGCGGGCCTCCGGGCTCGG  
CGTCCCCTTTGTCCCGGGAGCCCGCTCCCGGGCGTACAAACGAACACCGGCGCGAACTGCGCCAAGGAAC  
CTGAACGAAAGAGCGCGCTCCCGCCGCCCGGAAACGGTGCAGCGCGGGTGCCTCGTCTTCCATAC  
AAGTCAAACGACTCTCGGCAACGGATATCTCGGCTCTCGCATCGATGAAGAACGTAGCGAAATGCGATA  
CTTGGTGTGAATTGCAGAATCCCGTGAACCATCGAGTCTTTGAACGCAAGTTGCGCCCGAAGCCATCAGG  
CCGAGGGCACGCCTGCCTGGGCGTACACGCCGTTGCCCCCGCACCTCCCTCGGGAGCGTCGGGGGGC  
GGACGATGGCCTCCCGTGCCTACCCCGCGCGGTTGGCACAAATGCCGGTCTCGGCGACGGACGCCAC  
GACAATCGGTGGTGCCTGAACCTCGGTTGCCGTTGTGCGCTTTCGTGCGCCCCGAGCGGCCCGCGACC  
CTCGCTGCTCCCGCTTCGGCGGAGCTTTGACG

>AF186523.1 *Malus angustifolia*

TCGAACCTGCGCAGCAGAACGACCCGAGAACCAGTTTCAAAGTCGGGGGTTCGGCGGGCCTCCGGGCTCGG  
CGTCCCCTTCGTCCCGGGAGCCCGCTCCCGGGCGTACAAACGAACACCGGCGCGAACTGCGCCAAGGAAC  
CTGAACGAAAGAGCGCGCTCCCGCCGCCCGGAAACGGTGCAGCGCGGGTGCCTCGTCTTCSATAC  
AAGTCAAACGACTCTCGGCAACGGATATCTCGGCTCTCGCATCGATGAAGAACGTAGCGAAATGCGATA  
CTTGGTGTGAATTGCAGAATCCCGTGAACCATCGAGTCTTTGAACGCAAGTTGCGCCCGAAGCCATCAGG  
CCGAGGGCACGCCTGCCTGGGCGTACACGCCGTTGCCCCCGCACCTCCCTCGGGAGCGTCGGGGGGC  
GGACGATGGCCTCCCGTGCCTACCCCGCGCGGTTGGCACAAATGCCGGTCTCGGCGACGGACGCCAC  
GACAATCGGTGGTGCCTGAACCTCGGTTGCCGTTGTGCGCTTTCGTGCGCCCCGAGCGGCCCGCGACC  
CTCGCTGCTCCCGCTTCGGCGGAGCTTTGACG

>MK386850.1 *Malus orientalis*

TCGAACCTGCACGGCAGAACGACCCGAGAACCAGTTTCAAAGTCGGGGGTTCGGCGGGCCTCCTGGCCCGG  
CGTCCCCTTCGTCCCGGGAGCCCGCTCCCGGGCGTACAAACTTACACCGGCGCGTGTTCGCGCAAGGAAT  
CTGAACGAAAGAGCGCGCTCCCGCCGCCCGGAAACGGTGCAGCGCGGGTGCCTCGTCTTTCGATAA

GTCAAAACGACTCTCGGCAACGGATATCTCGGCTCTCGCATCGATGAAGAACGTAGCGAAATGCGATACT  
TGGTGTGAATTGCAGAATCCCGTGAACCATCGAGTCTTTGAACGCAAGTTGCGCCCGAAGCCATCAGGCC  
GAGGGCACGCCTGCCTGGGCGTACACGCCGTTGCCCCCGCGCATCCCTCGGGAGCGTCGGGGGGCGG  
ACGATGGCCTCCCGTGCTTACCCCGCGCGGTTGGCCAAATGCCGGTCTCGGCGACGAACGCCACGA  
CAATCGGTGGTCGTGCAACCTCGGTTGCCAGTTGTGCGCTTTCGTGCGCTCCGAGCGGCCCGCGACGCC  
CGCTGCTCTCGCTTCGGCGGAGCTTTCGACG

>AF186492.1 *Malus sieversii*

TCGAACCTGCACGGCAGAACGACCCGAGAACCCGTTTCAACTTCGGGGGTGCGCGGGCCTCCTGGCCCGG  
CGTCCCCTTCGTCCCGGGAGCCCGCTCCCGGGCGTACAACTTACACCGGCGCGTGTTCGCGCAAGGAAT  
CTGAACGAAAGAGCGCGCTCCCGCCGCCCGGAATCGGTGCGCGCGGGTGCCTCGTCTTCGATAA  
GTCAAAACGACTCTCGGCAACGGATATCTCGGCTCTCGCATCGATGAAGAACGTAGCGAAATGCGATACT  
TGGTGTGAATTGCAGAATCCCGTGAACCATCGAGTCTTTGAACGCAAGTTGCGCCCGAAGCCATCAGGCC  
GAGGGCACGCCTGCCTGGGCGTACACGCCGTTGCCCCCGCGCATCCCTCGGGAGCGTCGGGGGGCGG  
ACGATGGCCTCCCGTGCTTACCCCGCGCGGTTGGCCAAATGCCGGTCTCGGCGACGAACGCCACGA  
CAATCGGTGGTCGTGCAACCTCGGTTGCCAGTTGTGCGCTTTCGTGCGCTCCGAGCGGCCCGCGACGCC  
CGCTGCTCTCGCTTCGGCGGAGCTTTCACG

>AF186478.1 *Malus domestica*

TCGAACCTGCACGGCAGAACGACCCGAGAACCCGTTTCAACTTCGGGGGTGCGCGGGCCTCCTGGCCCGG  
CGTCCCCTTCGTCCCGGGAGCCCGCTCCCGGGCGTACAACTTACACCGGCGCGTGTTCGCGCAAGGAAT  
CTGAACGAAAGAGCGCGCTCCCGCCGCCCGGAAWCGGTGCGCGCGGGTGCCTCGTCTTCGATAA  
GTCAAAACGACTCTCGGCAACGGATATCTCGGCTCTCGCATCGATGAAGAACGTAGCGAAATGCGATACT  
TGGTGTGAATTGCAGAATCCCGTGAACCATCGAGTCTTTGAACGCAAGTTGCGCCCGAAGCCATCAGGCC  
GAGGGCACGCCTGCCTGGGCGTACACGCCGTTGCCCCCGCGCATCCCTCGGGAACGTGCGGGGGCGG  
ACGATGGCCTCCCGTGCTTACCCCGCGCGGTTGGCCAAATGCCGGTCTCGGCGACGAACGCCACGA  
CAATCGGTGGTCGTGCAACCTCGGTTGCCAGTTGTGCGCTTTCGTGCGCTCCGAGCGGCCCGCGACGCC  
CGCTGCTCTCGCTTCGGCGGAGCTTTCACG

>JQ392462.1 *Malus sylvestris*

TTGTGCAACCTGCAAGGCAGAACGACCCGAGAACCCGTTTCAACGTTGGGGGTGCGCGGGCCTCCGGGCC  
CGGCGTCCCCTTCGTCCCGGGAGCCCGCTCCCGGGCGTACAACTTACACCGGCGCGTGTTCGCGCAAGG  
AATATGAACGAAAGAGCGCGCTCCCGTCCGCCCGAAACGGTGCAGCGCGGGTGCCTCGTCTTCGATAA  
TAAAAGTCAAAACGACTCTCGGCAACGGATATCTCGGCTCTCGCATCGATGAANAACGTAGCGAAATGCG  
ATACTTGGTGTGAATTGCAGAATCCCGTGAACCATCGAGTTTTTGAACGCAAGTTGCGCCCGAAGCCATC  
AGGCCGAGGGCACGCCTGCCTGGGCGTACACGCCGTTGCCCCCGCGCATCCCTCGGGAGGGTTCGGG  
AGGGGGCGGACGATGNCCTCCCGTGCGTACCCCGCGCGGTTGGAATAAATGCCGGTCTCGGCGACGA  
ACGCCACGACAATTGGTGGTGCCTGCAACCTCGGTTGCCAGTTGTGTGCTTTCGCCCGCTCCGAGTGGCC  
CGAGACGCTTGCTGCTTTCGCGTAGCTTTCACG

>JQ392463.1 *Malus prunifolia*

TTGTGCAACCTGCACGGCAGAACGACCCGAGAACCCGTTTCAACGTCGGGGGTGCGCGGGCCTCCTGGCC  
CGGCGTCCCCTTCGTCCCGGGAGCCCGCTCCCGGGCGTACAACTTACACCGGCGCGTGTTCGCGCAAGG  
AATCTGAACGAAAGAGCGCGCTCCCGCCGCCCGGAACGGTGCAGCGCGGGTGCCTCGTCTTCGATAA

TAAGTCAAACGACTCTCGGCAACGGATATCTCGGCTCTCGCATCGATGAAGAACGTAGCGAAATGCGAT  
 ACTTGGTGTGAATTGCAGAATCCCGTGAACCATCGAGTCTTTGAACGCAAGTTGCGCCCCGAAGCCATCAG  
 GCCGAGGGCACGCCTGCCTGGGCGTCACACGCCGTTGCCCCCGCGCATCCCTCGGGAGCGTCGGGGGG  
 CGGACGATGGCCTCCCGTGCCTCACCCGCGCGGTTGGCACAAATGCCGGGTCCTCGGCGACGAACGCCA  
 CGACAATCGGTGGTGCCTCGAACCTCGGTTGCCAGTTGTGCGCYTTCGTGCGCTCCGAGCGGCCCGCGAC  
 GCTCGCTGCTCTCGCTTCGGCGGAGCTTTCAACG

[1] #EF113171.1\_M. kansuensis [2] #JQ392462.1\_M. sylvestris [3] #MH270485.1\_M. yunnanensis [4]  
 #JQ392445.1\_M. prattii [5] #JQ392448.1\_M. ioensis [6] #AF186525.1\_M. coronaria [7] #AF186523.1\_M.  
 angustifolia [8] #MK386850.1\_M. orientalis [9] #AF186492.1\_M. sieversii [10] #AF186478.1\_M.  
 domestica [11] #JQ392463.1\_M. prunifolia

| [1]  | 2      | 3      | 4      | 5      | 6      | 7      | 8      | 9      | 10     | 11]    |
|------|--------|--------|--------|--------|--------|--------|--------|--------|--------|--------|
| [ 1] |        |        |        |        |        |        |        |        |        |        |
| [ 2] | 0.0732 |        |        |        |        |        |        |        |        |        |
| [ 3] | 0.0258 | 0.075  |        |        |        |        |        |        |        |        |
| [ 4] | 0.0259 | 0.0714 | 0.0051 |        |        |        |        |        |        |        |
| [ 5] | 0.0529 | 0.0692 | 0.0584 | 0.0548 |        |        |        |        |        |        |
| [ 6] | 0.0475 | 0.0673 | 0.0529 | 0.0493 | 0.0051 |        |        |        |        |        |
| [ 7] | 0.0475 | 0.0637 | 0.0529 | 0.0494 | 0.0034 | 0.0017 |        |        |        |        |
| [ 8] | 0.0549 | 0.0383 | 0.0567 | 0.0531 | 0.0456 | 0.0437 | 0.0402 |        |        |        |
| [ 9] | 0.0549 | 0.0384 | 0.0567 | 0.0531 | 0.0492 | 0.0474 | 0.0438 | 0.0034 |        |        |
| [10] | 0.0549 | 0.0384 | 0.0567 | 0.0531 | 0.0492 | 0.0474 | 0.0438 | 0.0085 | 0.0051 |        |
| [11] | 0.0458 | 0.0295 | 0.0475 | 0.044  | 0.0402 | 0.0384 | 0.0349 | 0.0085 | 0.0085 | 0.0068 |

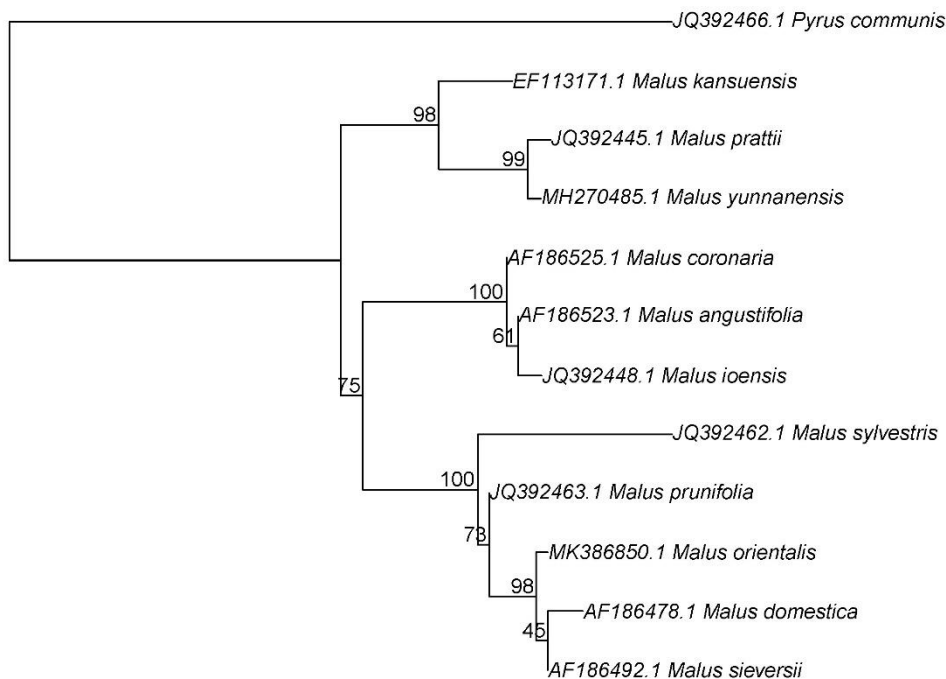

**Table S3** Analysis of Variance on the effect of domestication and Malus phylogeny (species) on fungal and bacterial diversity based on Shannon index. In “Domestication” compares the three Domestication groups i.e. *M. domestica*, apple progenitor species (*M. sieversii*, *M. orientalis*, *M. prunifolia*, and *M. sylvestris*), and non-progenitor Malus species (*M. kansuensis*, *M. yunnanensis*, *M. angustifolia*, *M. coronaria*, *M. ioensis*, *M. prattii*). Degrees of freedom for domestication was 2 and for species 8.

|                     | Fungi         |          |          |          | Bacteria      |          |          |          |
|---------------------|---------------|----------|----------|----------|---------------|----------|----------|----------|
|                     | Domestication |          | Species  |          | Domestication |          | Species  |          |
|                     | <i>F</i>      | <i>P</i> | <i>F</i> | <i>P</i> | <i>F</i>      | <i>P</i> | <i>F</i> | <i>P</i> |
| Richness            | 9.143         | 0.0048   | 1.513    | 0.178    | 0.143         | 0.867    | 0.856    | 0.559    |
| Evenness            | 1.470         | 0.2399   | 2.132    | 0.048    | 2.213         | 0.120    | 1.833    | 0.093    |
| Diversity (Shannon) | 5.004         | 0.0012   | 1.394    | 0.071    | 0.686         | 0.508    | 0.906    | 0.519    |

**Table S4** Results of statistical pairwise-comparisons of fungal and bacterial diversity based on Shannon index and community composition based on Bray-Curtis dissimilarity index using adonis (~Permanova). *P* values were adjusted using FDR method for both tests. The test was done to compare the three Domestication groups i.e. *M. domestica*, apple progenitor species (*M. sieversii*, *M. orientalis*, *M. prunifolia*, and *M. sylvestris*), and wild Malus species (*M. kansuensis*, *M. yunnanensis*, *M. angustifolia*, *M. coronaria*, *M. ioensis*, *M. prattii*).

|          |                             | Permanova             |          | Shannon  | Richness | Evenness |
|----------|-----------------------------|-----------------------|----------|----------|----------|----------|
|          |                             | <i>R</i> <sup>2</sup> | <i>P</i> | <i>P</i> | <i>P</i> | <i>P</i> |
| Fungi    | Wild vs Progenitors         | 0.033                 | 0.038    | 0.003    | 0.004    | 0.272    |
|          | Wild vs Domesticated        | 0.053                 | 0.006    | 0.006    | 0.001    | 0.566    |
|          | Progenitors vs Domesticated | 0.033                 | 0.038    | 0.983    | 0.757    | 0.911    |
| Bacteria | Wild vs Progenitors         | 0.047                 | 0.003    | 0.459    | 0.890    | 0.561    |
|          | Wild vs Domesticated        | 0.062                 | 0.003    | 0.528    | 0.980    | 0.160    |
|          | Progenitors vs Domesticated | 0.029                 | 0.123    | 0.998    | 0.966    | 0.594    |
